# Supplementary material for: Improving polygenic risk prediction of renal function by removing biomarker-specific effects
Source: Research Square preprint supplement (doi:10.21203/rs.3.rs-6329094/v1), 2025-04-03
Supplement: Supplementary file 1 [file 0dfdd1982db40dbf1b78031e.xlsx]

## Sheet: Table1
Extended Data Table 1. The genetic inflation factors and heritabilities for five eGFR values.
	eGFRcys	eGFRcr2021	eGFRcr2009	eGFRcr-cys2021	eGFRcr-cys2012
Genetic inflation factor	1.21	1.27	1.23	1.22	1.22
Heritability	0.22 (0.02)	0.21 (0.01)	0.21 (0.01)	0.23 (0.02)	0.21 (0.02)

## Sheet: Table2
Extended Data Table 2. The genetic correlation estimates of five eGFR GWAS.
	eGFRcys	eGFRcr-2021	eGFRcr-2009	eGFRcr-cys-2021	eGFRcr-cys-2012
eGFRcys	1	0.587 (0.039)	0.590 (0.040)	0.940 (0.005)	0.923 (0.006)
eGFRcr2021		1	0.998 (0.000)	0.812 (0.032)	0.834 (0.032)
eGFRcr2009			1	0.816 (0.033)	0.839 (0.032)
eGFRcr-cys2021				1	0.999 (0.000)
eGFRcr-cys2012					1

## Sheet: Table3
Extended Data Table 3. Model R2 for covariates only model and partial R2 of three PRS, without adjusting for BMI and BMI PRS Covariate only model is eGFR ~ necessary covariates and PRS model is eGFR ~ necessary covariates + developed PRS.
	trait	R2.covarOnly	partial.R2(shared PRS)	partial.R2(biomarker-specific PRS)	partial.R2(benchmark PRS)
eGFR values	eGFRcys	0.2706	0.0348	0.033	0.093
	eGFRcr-2021	0.2079	0.0444	0.0127	0.0277
	eGFRcr-2009	0.2262	0.0449	0.0128	0.0279
	eGFRcr-cys-2021	0.2386	0.0534	0.0337	0.0892
	eGFRcr-cys-2012	0.2664	0.0534	0.0321	0.084

## Sheet: Table4
Extended Data Table 4. Model R2 for covariates only model and partial R2 of three PRS, adjusting for BMI and BMI PRS Covariate only model is eGFR ~ necessary covariates + BMI + BMI-PRS and PRS model is eGFR ~ necessary covariates + BMI + BMI-PRS + developed PRS.
	trait	R2.covarOnly	partial.R2(shared PRS)	partial.R2(biomarker-specific PRS)	partial.R2(benchmark PRS)
eGFR values	eGFRcys	0.3438	0.0354	0.0332	0.0926
	eGFRcr-2021	0.2133	0.0444	0.0127	0.0277
	eGFRcr-2009	0.2316	0.045	0.0128	0.0279
	eGFRcr-cys-2021	0.2918	0.054	0.034	0.089
	eGFRcr-cys-2012	0.3136	0.0538	0.0323	0.0837
