# Supplementary material for: Improving polygenic risk prediction of renal function by removing biomarker-specific effects
Source: Research Square preprint supplement (doi:10.21203/rs.3.rs-6329094/v1), 2025-04-03
Supplement: Supplementary file 1 [file 159855b6f8e48c932a3f90dd.pdf]

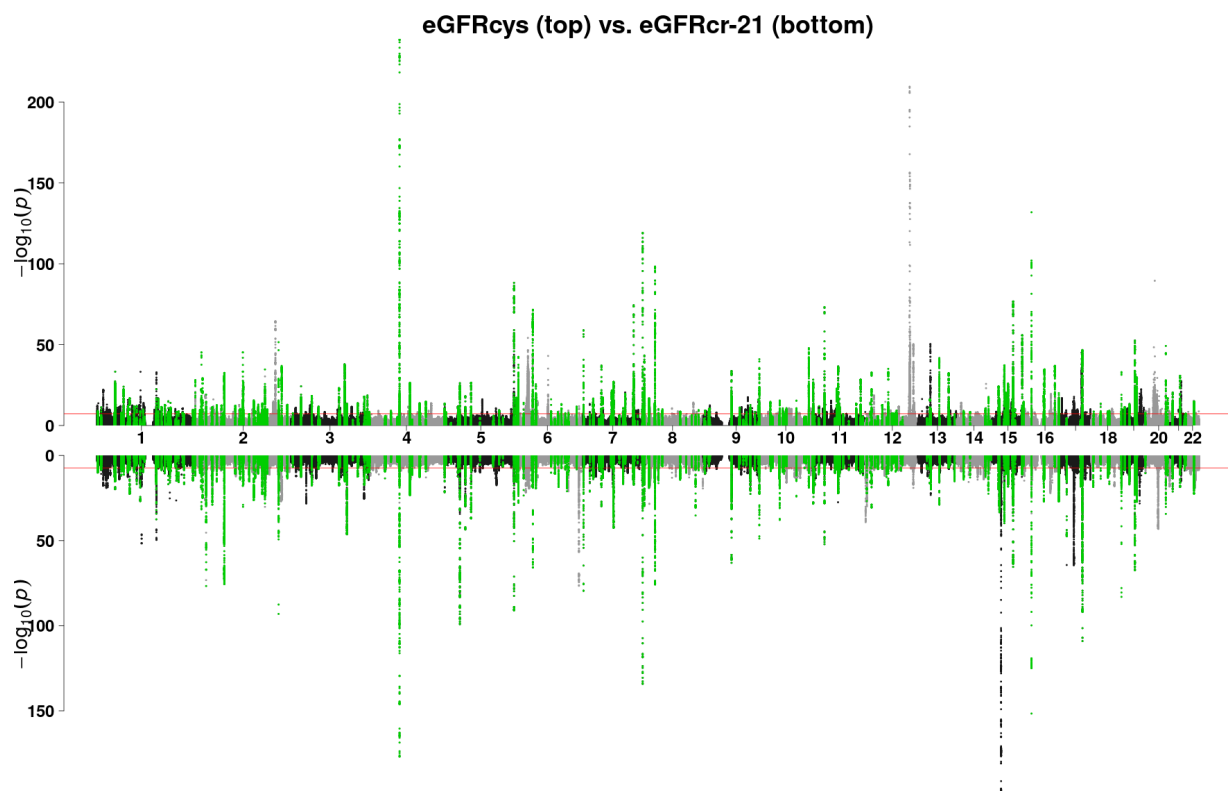

**Extended Data Fig 2.** Mirror Manhattan plot comparing the GWAS between eGFRcys (top panel) and eGFRcr<sup>2021</sup> (bottom panel). The variants inside the shared regions are highlighted as green.

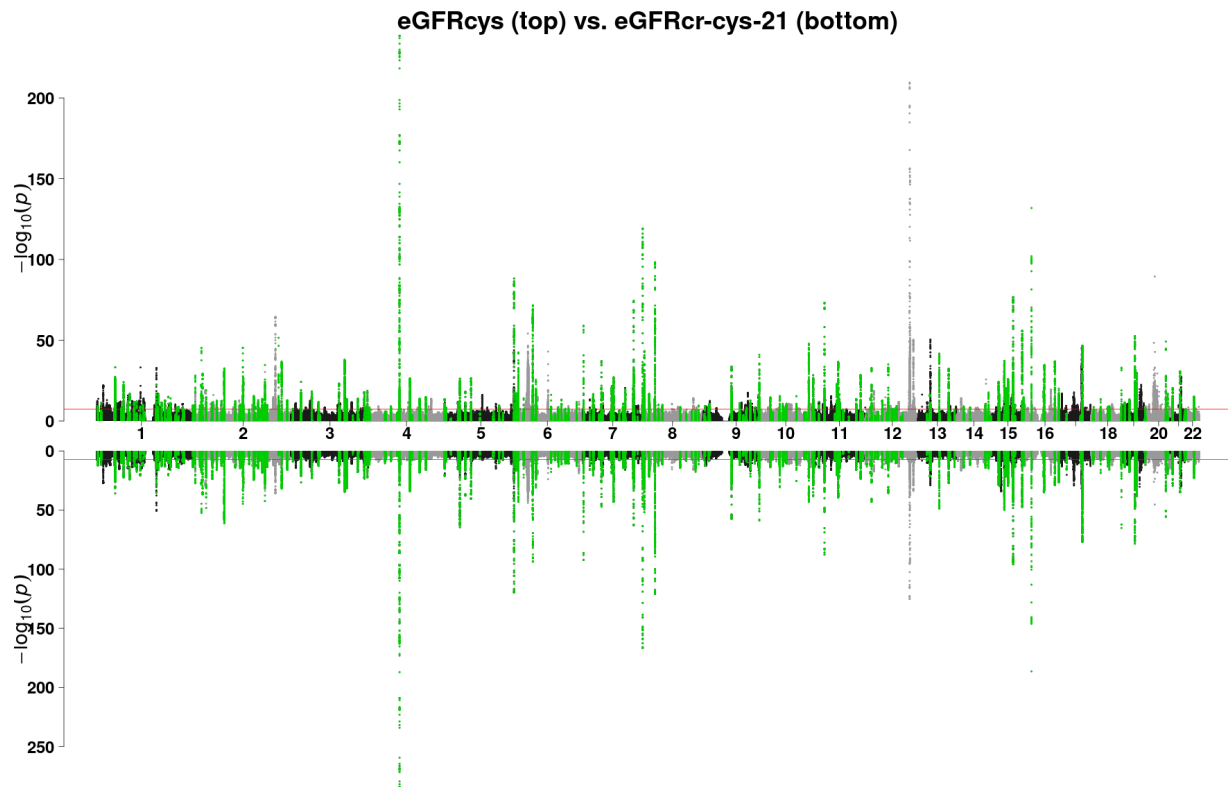

**Extended Data Fig 3.** Mirror Manhattan plot comparing the GWAS between eGFRcys (top panel) and eGFRcys-cr<sup>2021</sup> (bottom panel). The variants inside the shared regions are highlighted as green.

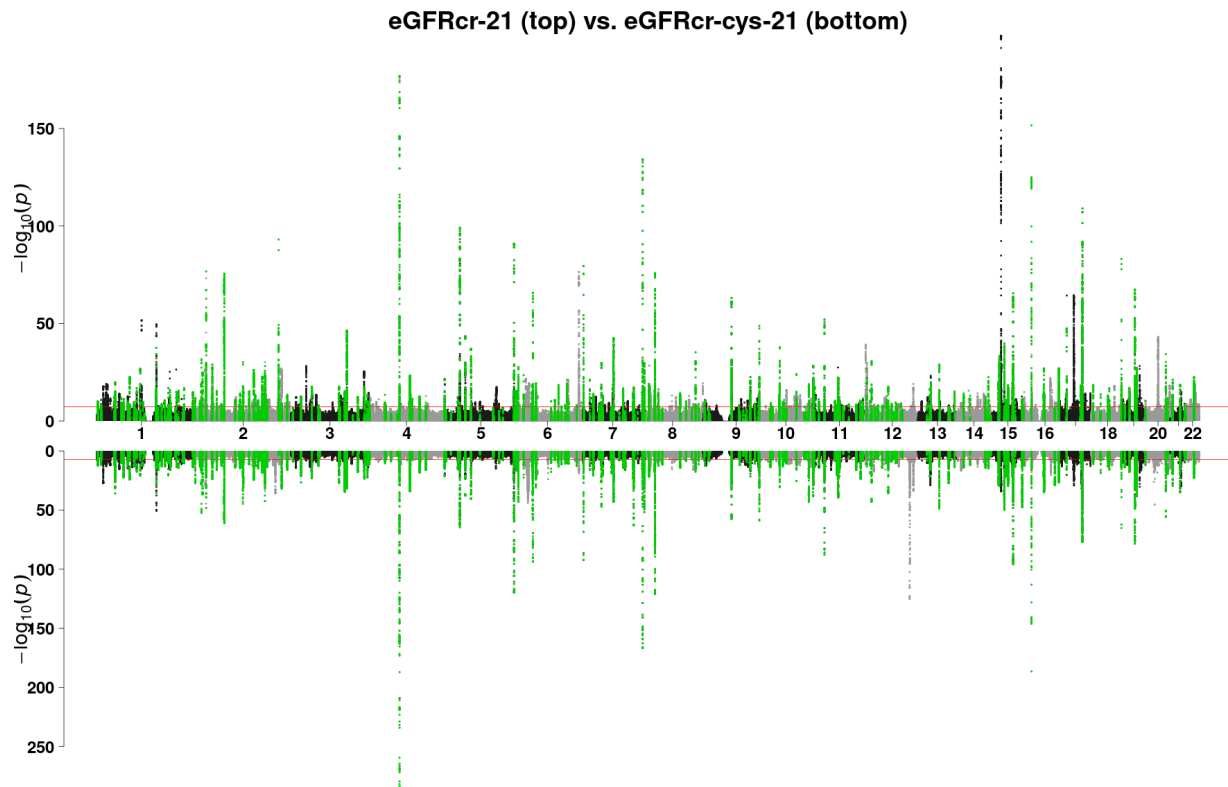

**Extended Data Fig 4.** Mirror Manhattan plot comparing the GWAS between eGFRcr<sup>2021</sup> (top panel) and eGFRcys-cr<sup>2021</sup> (bottom panel). The variants inside the shared regions are highlighted as green.

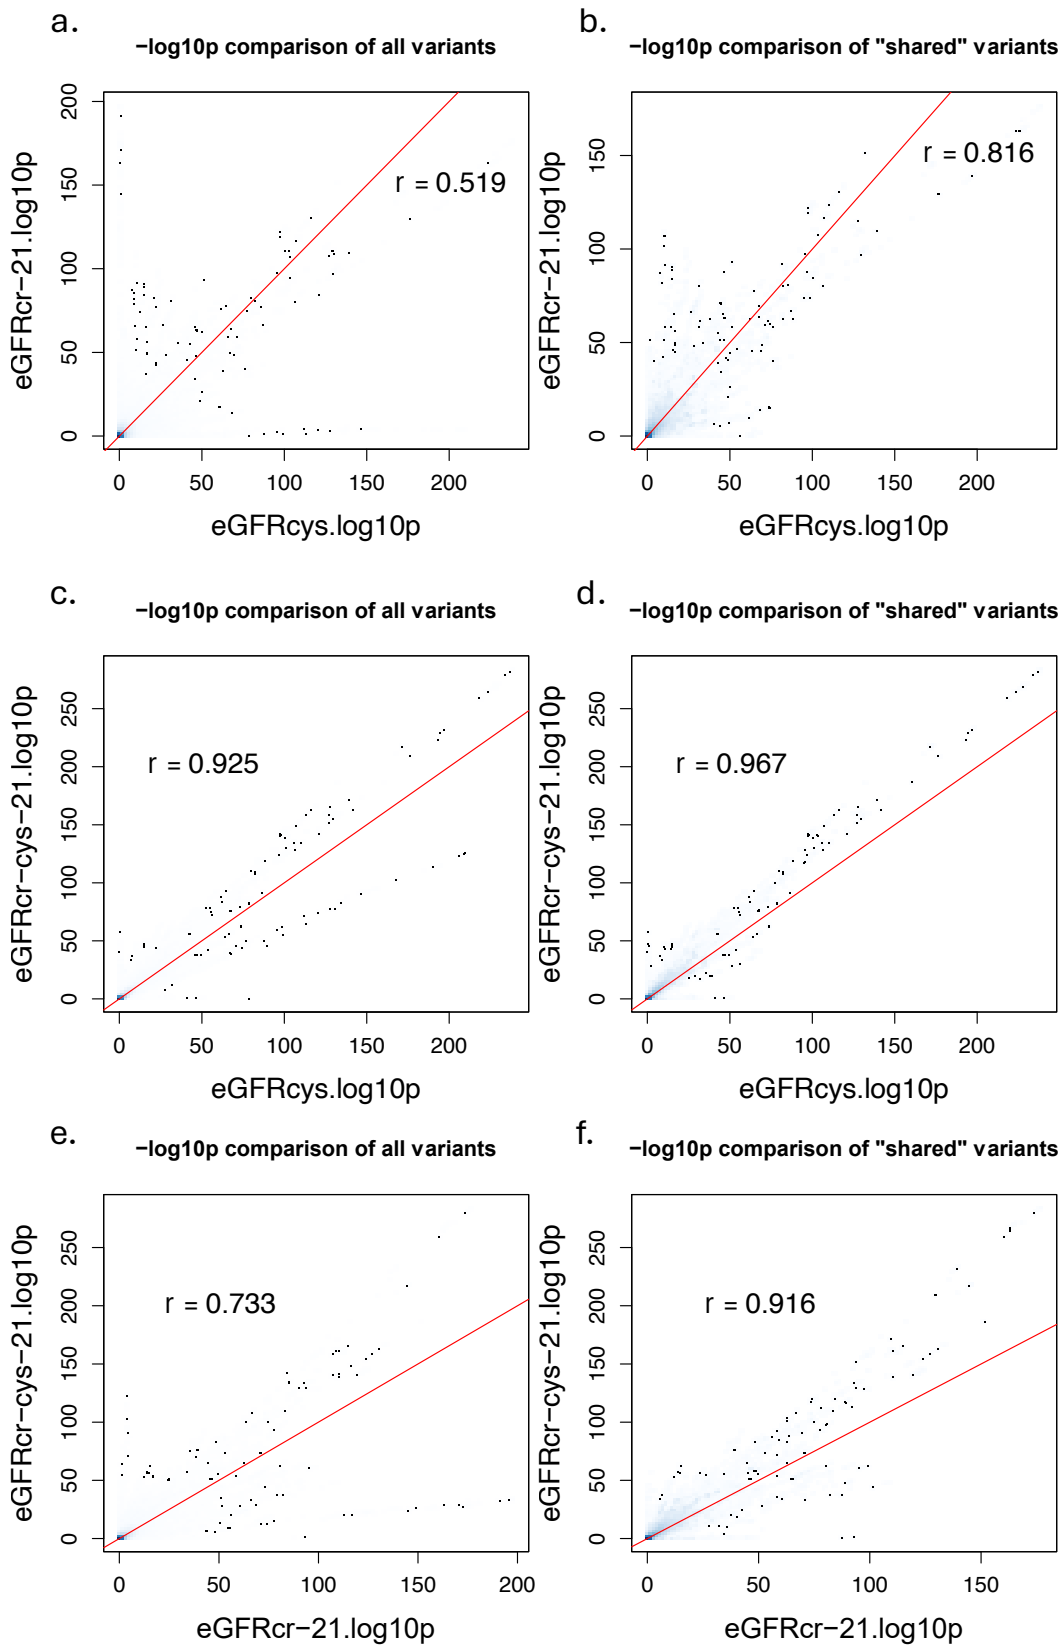

**Extended Data Fig 5.** Scatterplot comparing the  $-\log_{10}p$  values for all GWAS variants and “shared” variants. **a,b.** Comparing the GWAS  $-\log_{10}p$  between eGFRcys and eGFRcr<sup>2021</sup>. The correlation for all GWAS variants and variants only inside the shared regions are 0.519 and 0.816, respectively; **c,d.** Comparing the GWAS  $-\log_{10}p$  between eGFRcys and eGFRcys-cr<sup>2021</sup>. The correlation for all GWAS variants and variants only inside the shared regions are 0.925 and 0.967, respectively; **e,f.** Comparing the GWAS  $-\log_{10}p$  between eGFRcr<sup>2021</sup> and eGFRcys-cr<sup>2021</sup>. The correlation for all GWAS variants and variants only inside the shared regions are 0.733 and 0.916, respectively;
